# Supplementary material for: Examining the relationship of vaping to smoking initiation among US youth and young adults: a reality check
Source: PubMed Central journal article supplement — Tob Control. 2018 Nov 20;28(6):629–35. doi: 10.1136/tobaccocontrol-2018-054446 (PMC6860409; doi:10.1136/tobaccocontrol-2018-054446), 2018-11-20

Supplement 2.

Supplement Figure 1. Monitoring the Future, 10th Grade Students, Last 30-Day Cigarette Use, Trends Pre-Vaping (2004-2013) and Post-Vaping Estimates (2014-2017)

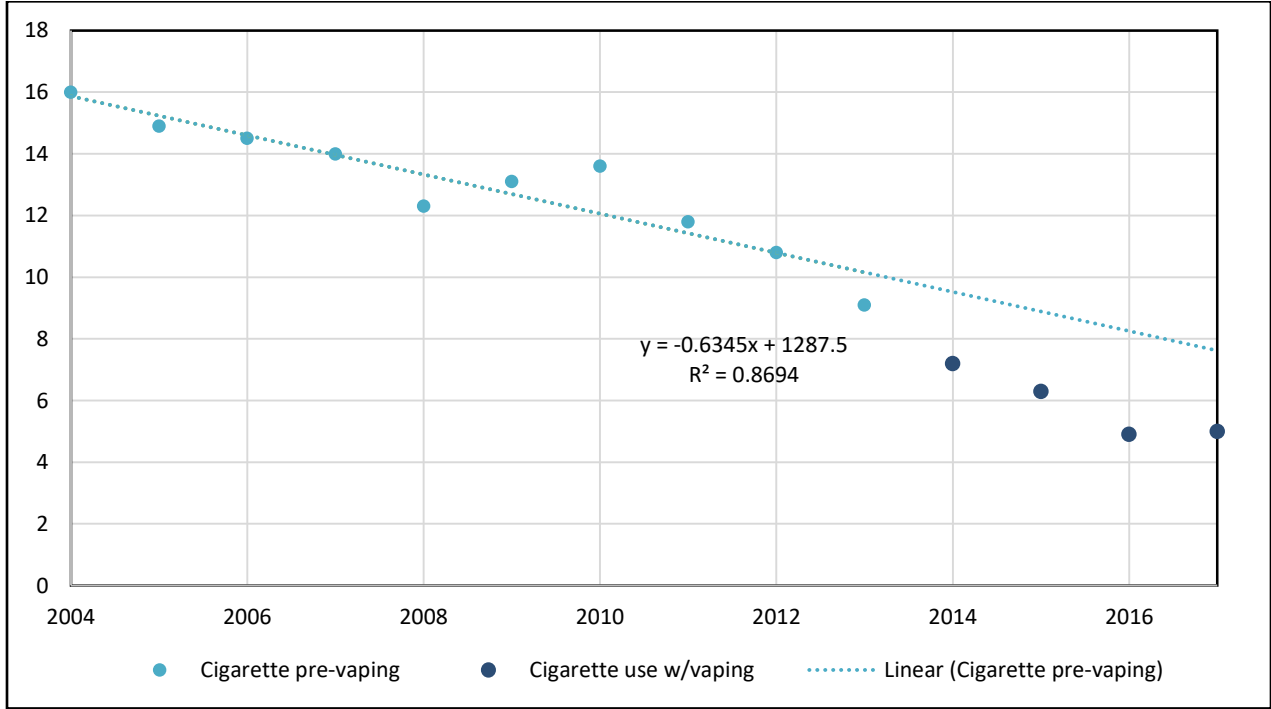

Supplement Figure 2. Monitoring the Future, 12th Grade Students, Last 30-Day Cigarette Use, Trends Pre-Vaping (2004-2013) and Post-Vaping Estimates (2014-2017)

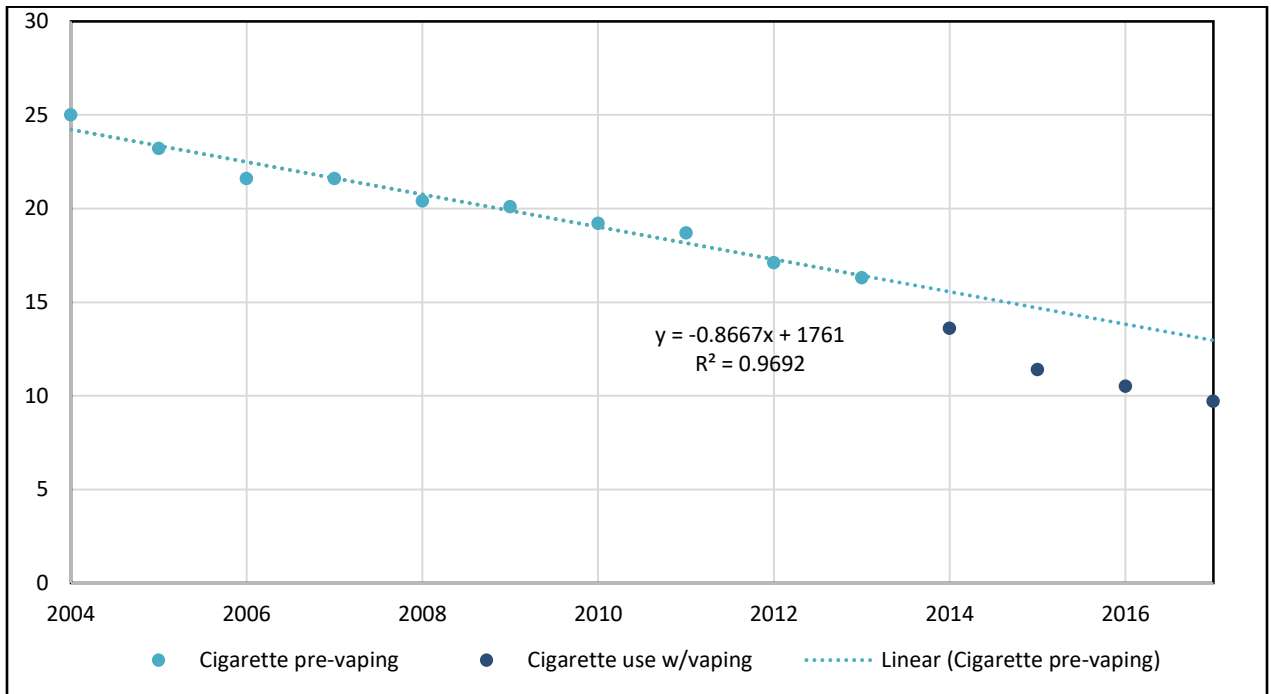

**Supplement Figure 3. National Youth Tobacco Survey, High Schoolers, Last 30-Day Cigarette Use, Trends Pre-Vaping (2011-2013) and Post-Vaping Estimates (2014-2017)**

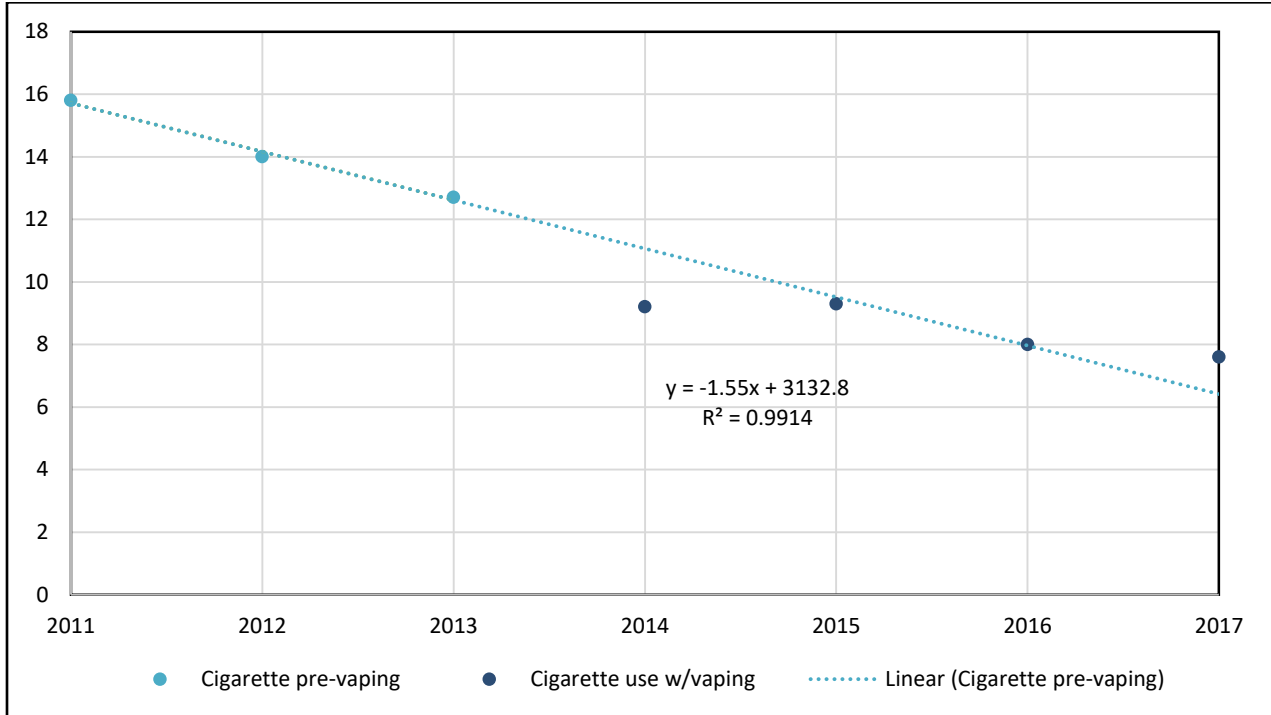

**Supplement Figure 4. Youth Risk Behavior Survey, High Schoolers, Last 30-Day Cigarette Use, Trends Pre-Vaping (2005-2013) and Post-Vaping Estimates (2015-2017)**

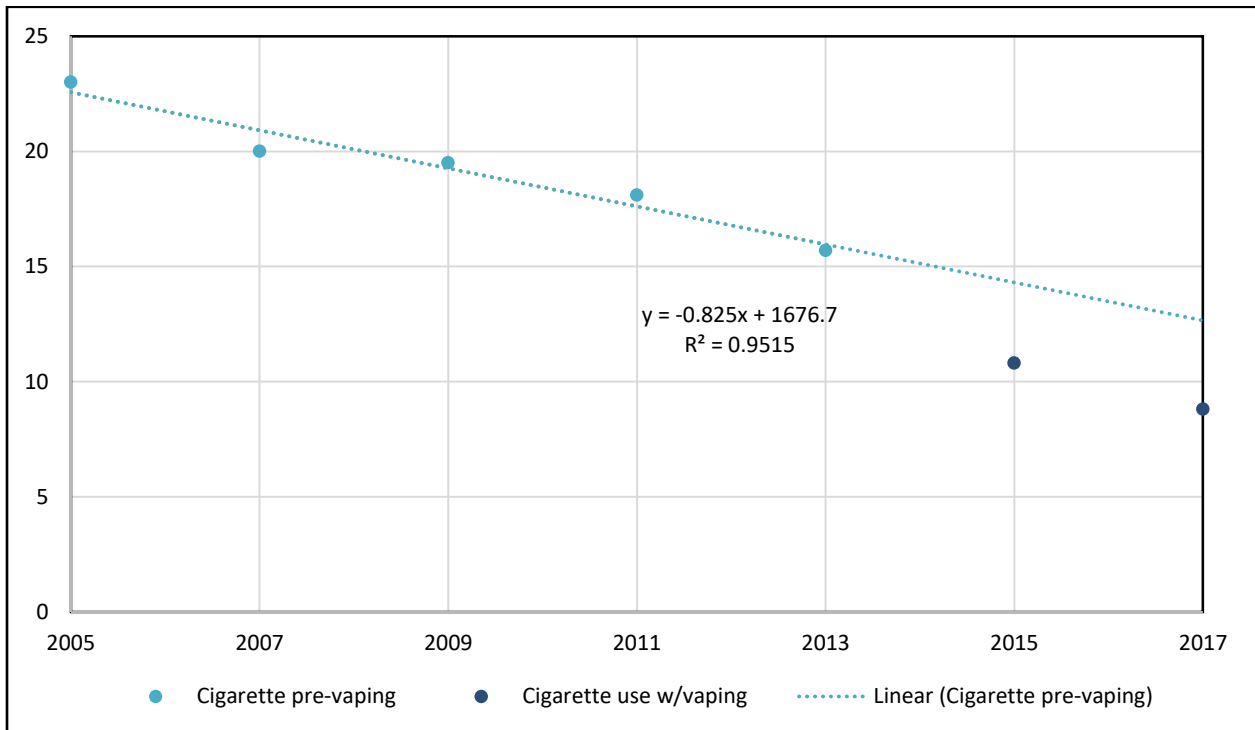

**Supplement Figure 5. Monitoring the Future, Ages 18-21, Last 30-Day Cigarette Use, Trends Pre-Vaping (2004-2013) and Post-Vaping Estimates (2014-2016)**

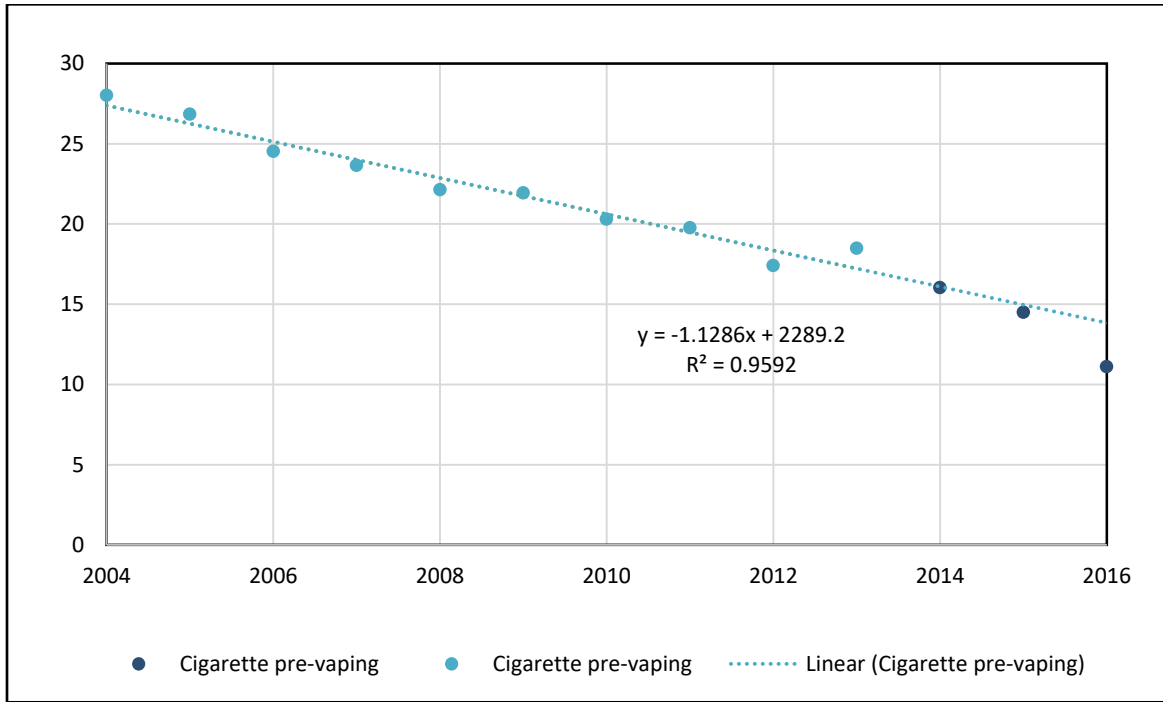

**Supplement Figure 6. Monitoring the Future, Ages 22-24, Last 30-Day Cigarette Use, Trends Pre-Vaping (2004-2013) and Post-Vaping Estimates (2014-2016)**

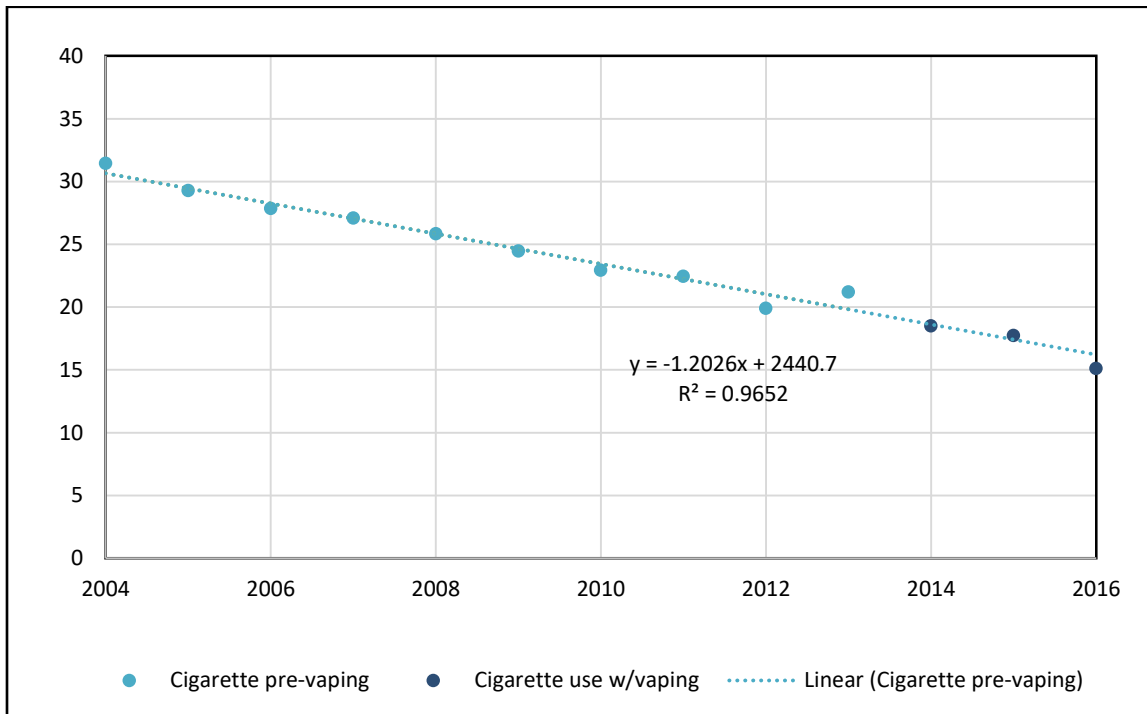

**Supplement Figure 7. National Survey of Drug Use and Health, Ages 18-25, Last 30-Day Cigarette Use, Trends Pre-Vaping (2004-2013) and Post-Vaping Estimates (2014-2016)**

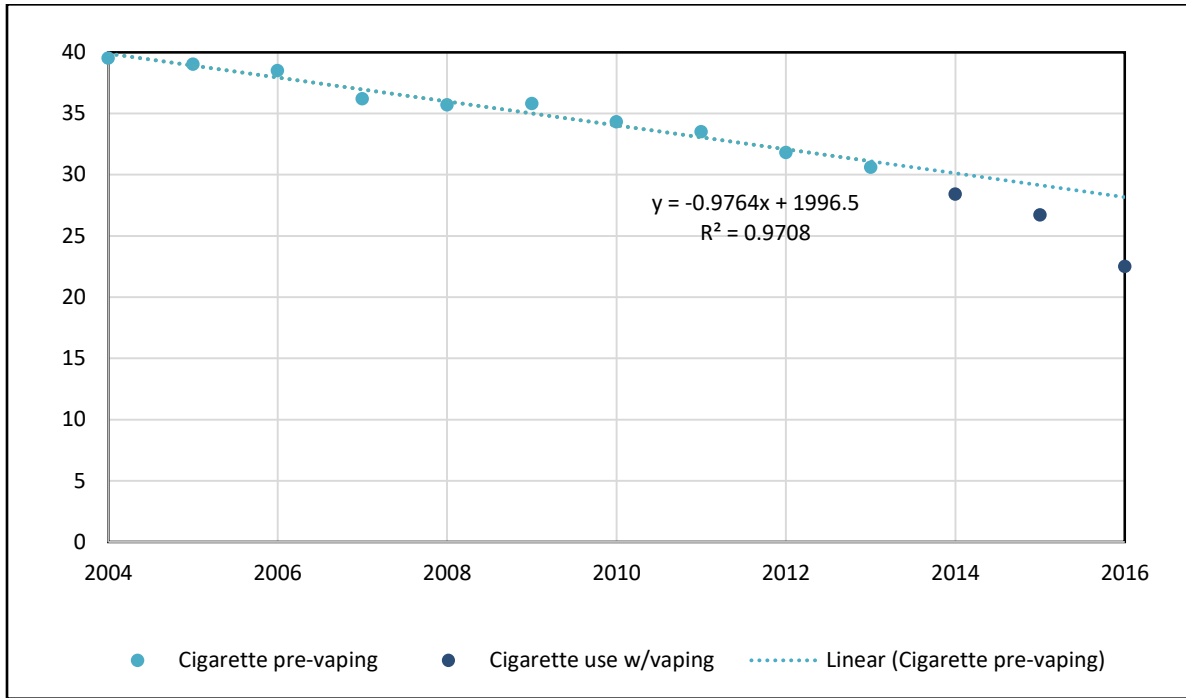

**Supplement Figure 8. Monitoring the Future, 10th Grade Students, Daily Cigarette Use, Trends Pre-Vaping (2004-2013) and Post-Vaping Estimates (2014-2017)**

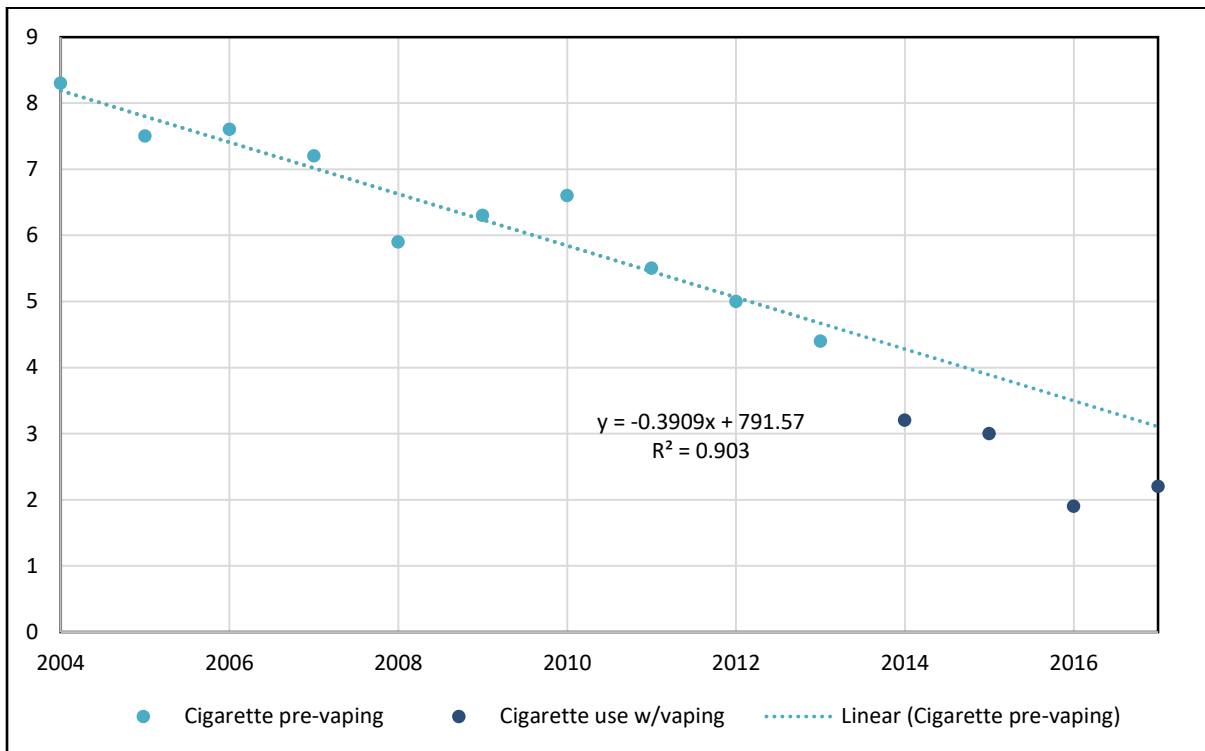

**Supplement Figure 9. Monitoring the Future High School 12th Grade Students, Daily Cigarette Use, Trends Pre-Vaping (2004-2013) and Post-Vaping Estimates (2014-2017)**

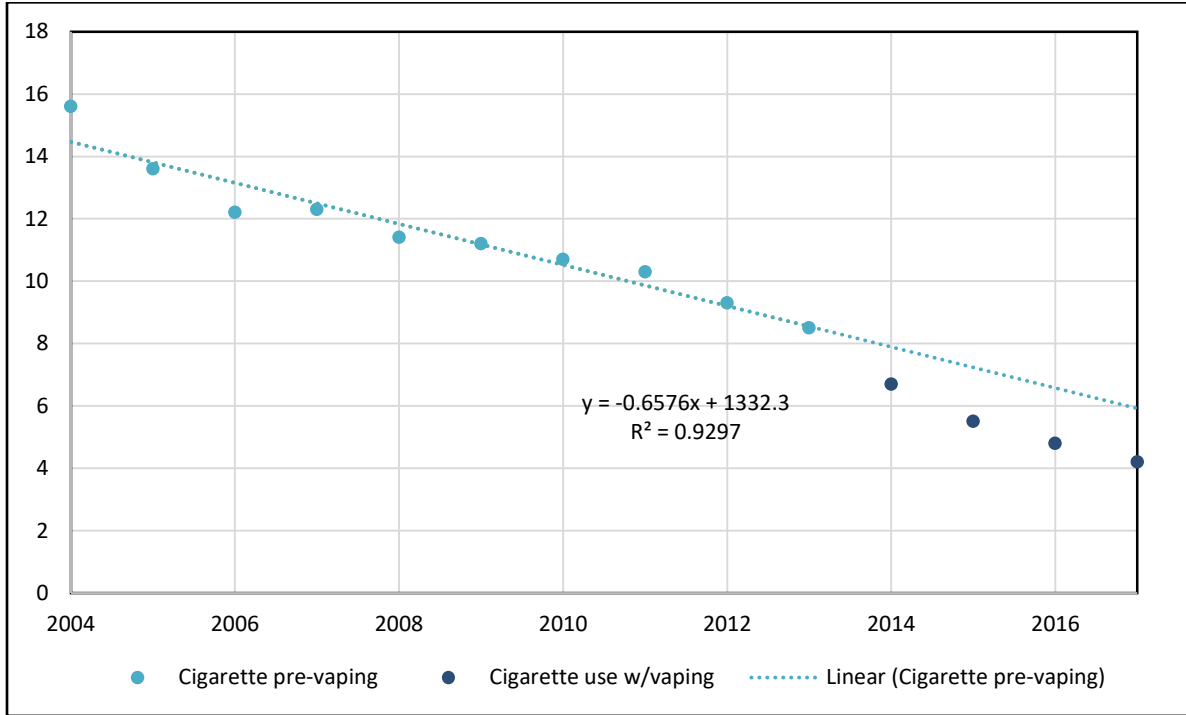

**Supplement Figure 10. Monitoring the Future, Ages 18-21, Daily Cigarette Use, Trends Pre-Vaping (2004-2013) and Post-Vaping Estimates (2014-2016)**

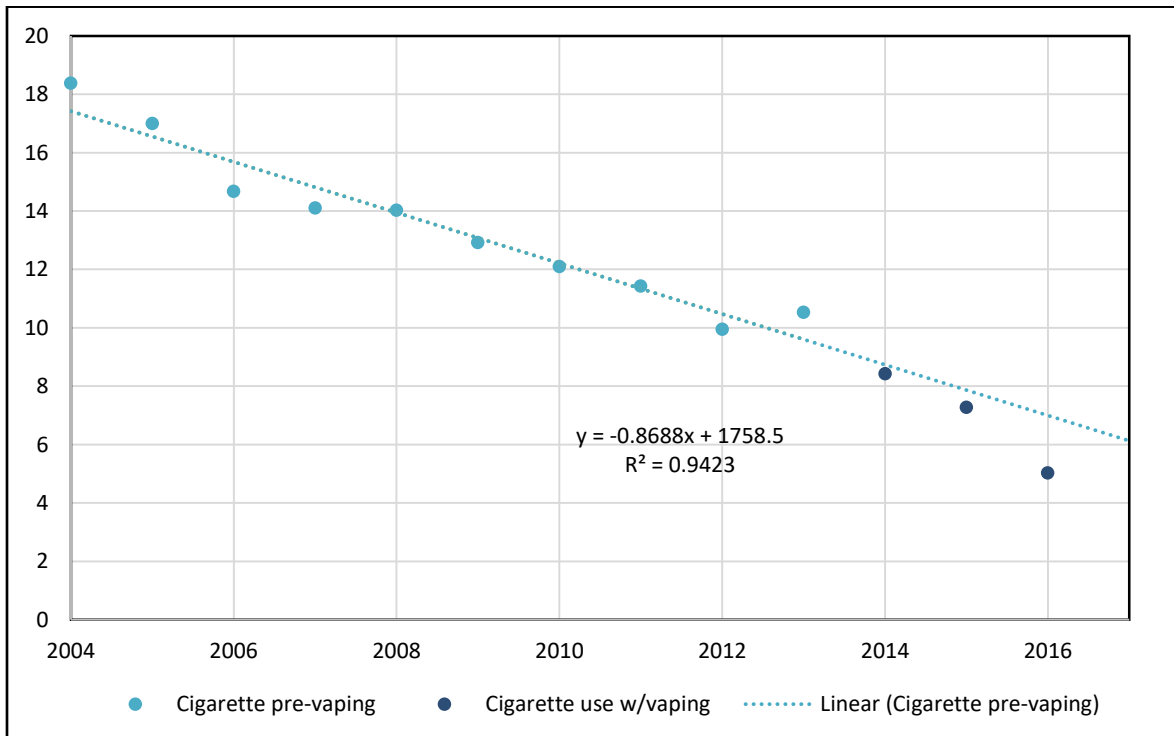

**Supplement Figure 11. Monitoring the Future, Ages 22-24, Daily Cigarette Use, Trends Pre-Vaping (2004-2013) and Post-Vaping Estimates (2014-2016)**

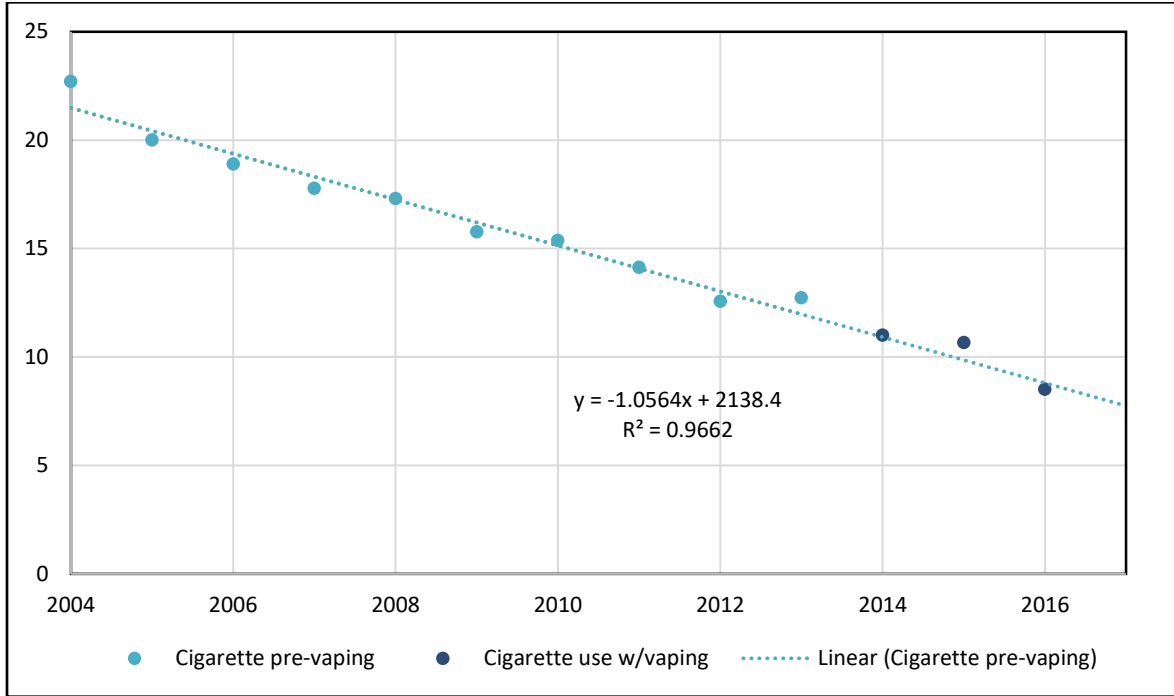

**Supplement Figure 12. National Survey of Drug Use and Health, Ages 18-25, Daily Cigarette Use, Trends Pre-Vaping (2004-2013) and Post-Vaping Estimates (2014-2016)**

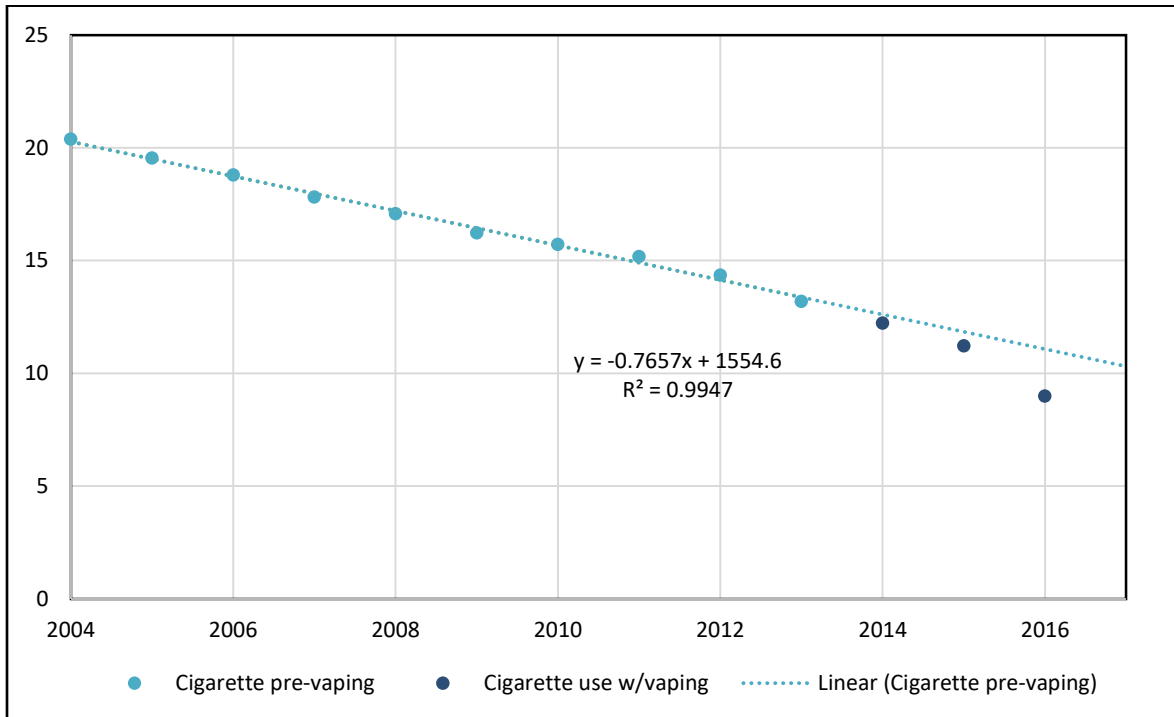

**Supplement Figure 13. National Health Interview Survey Male, Ages 18-24, 100 Cigarettes per Lifetime, Trends Pre-Vaping (2004-2013) and Post-Vaping Estimates (2014-2016)**

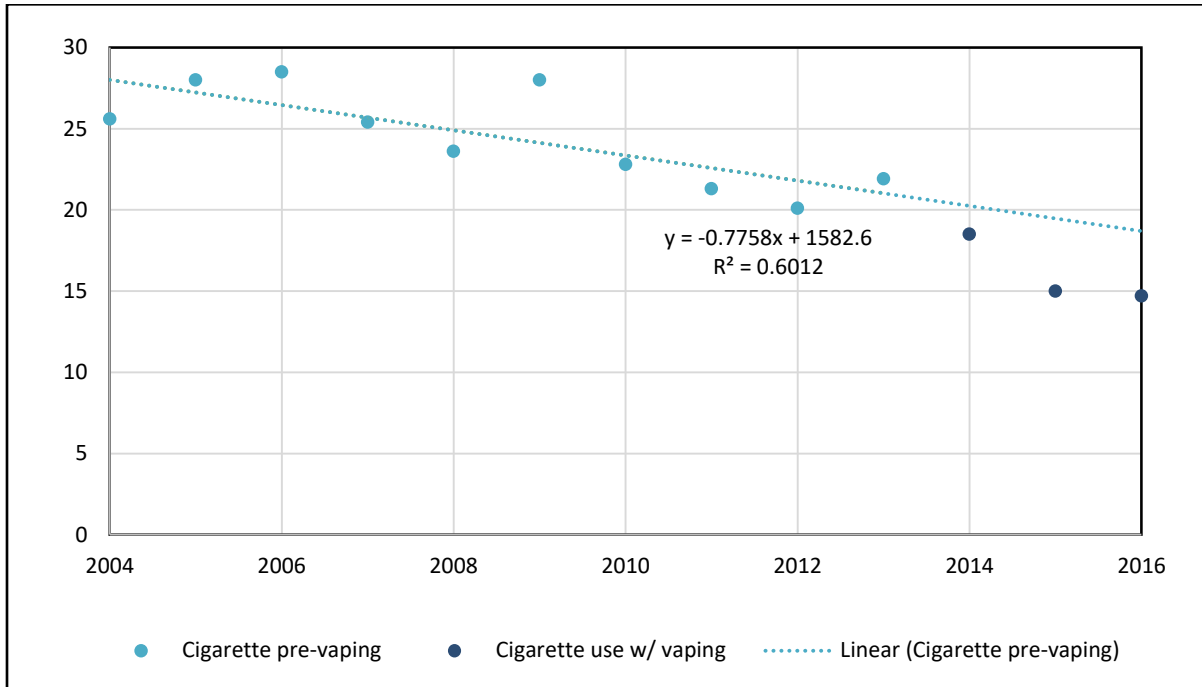

**Supplement Figure 14. National Health Interview Survey Female, Ages 18-24, 100 Cigarettes per Lifetime, Trends Pre-Vaping (2004-2013) and Post-Vaping Estimates (2014-2016)**

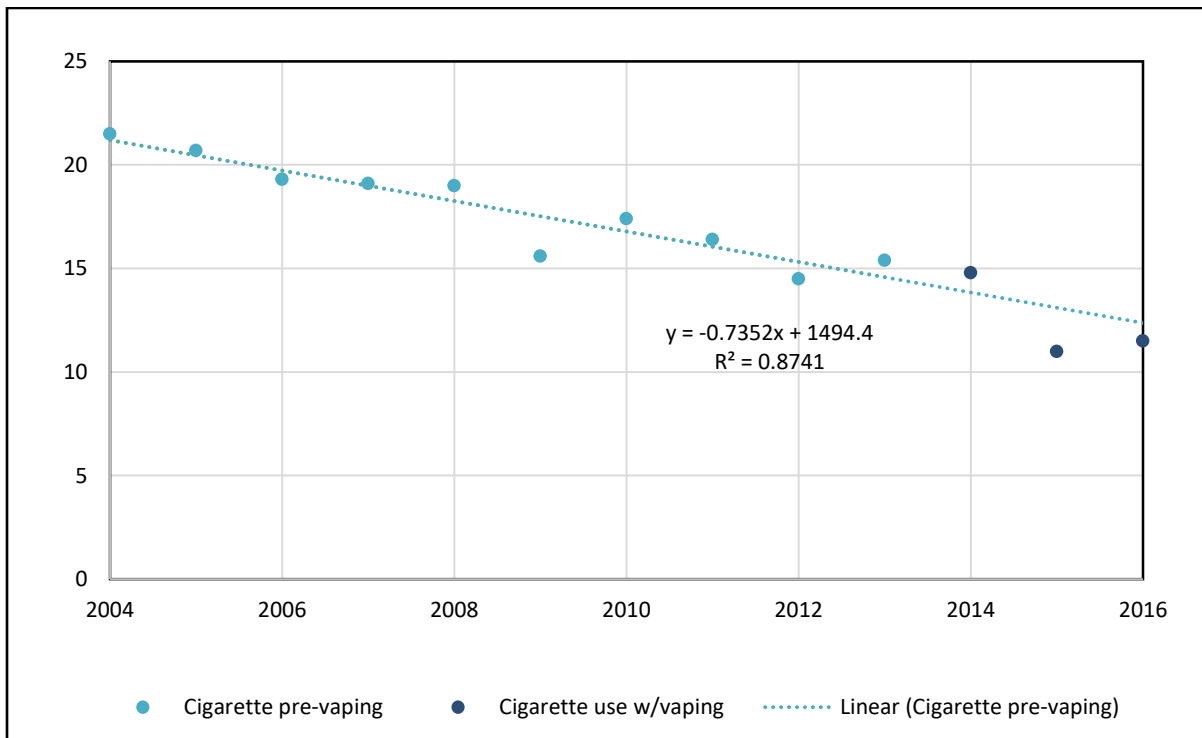

**Supplement Figure 15. Monitoring the Future, 12th Grade Students, Ratio of Daily Cigarette Use to Last 30-Day Cigarette Use, Trends Pre-Vaping (2004-2013) and Post-Vaping Estimates (2014-2017)**

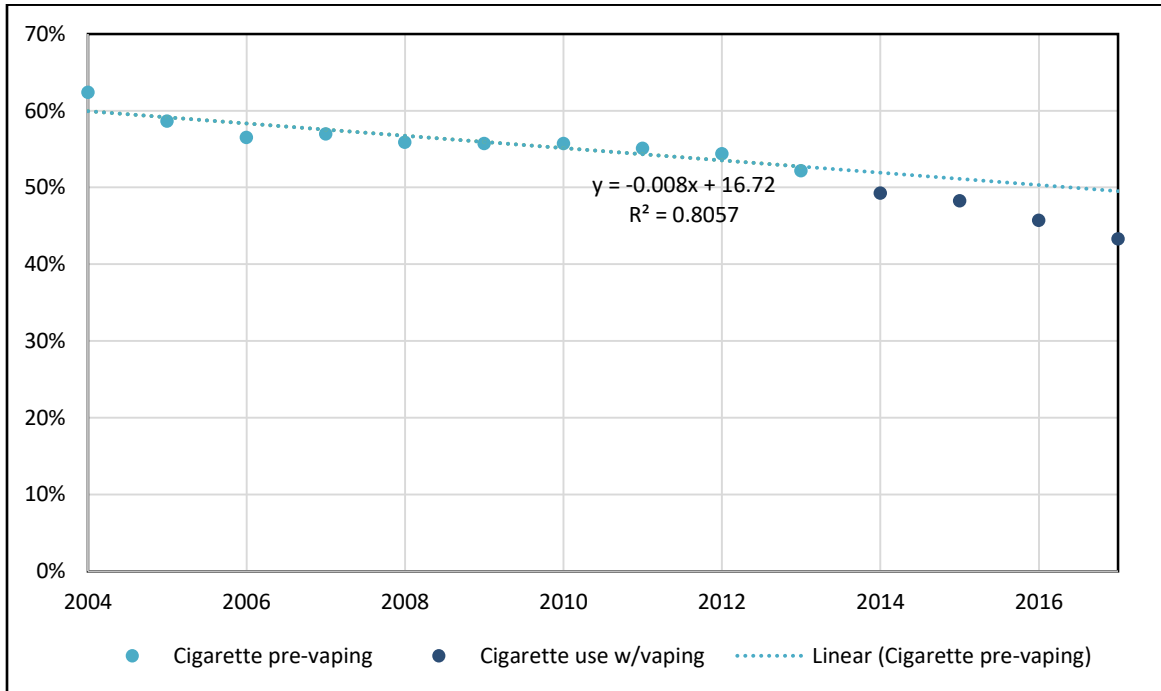

**Supplement Figure 16. Monitoring the Future, Ages 18-21, Ratio of Daily Cigarette Use to Last 30-Day Cigarette Use, Trends Pre-Vaping (2004-2013) and Post-Vaping Estimates (2014-2016)**

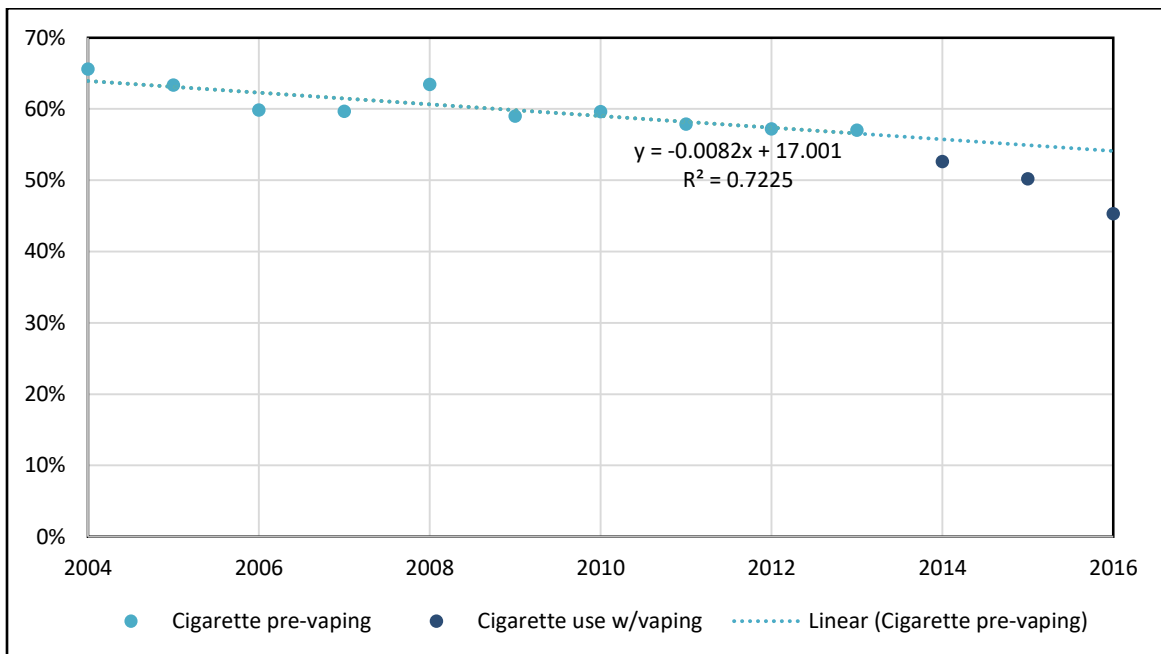



**Supplement Figure 17. Monitoring the Future, Ages 22-24, Ratio of Daily Cigarette Use to Last 30-Day Cigarette Use, Trends Pre-Vaping (2004-2013) and Post-Vaping Estimates (2014-2016)**

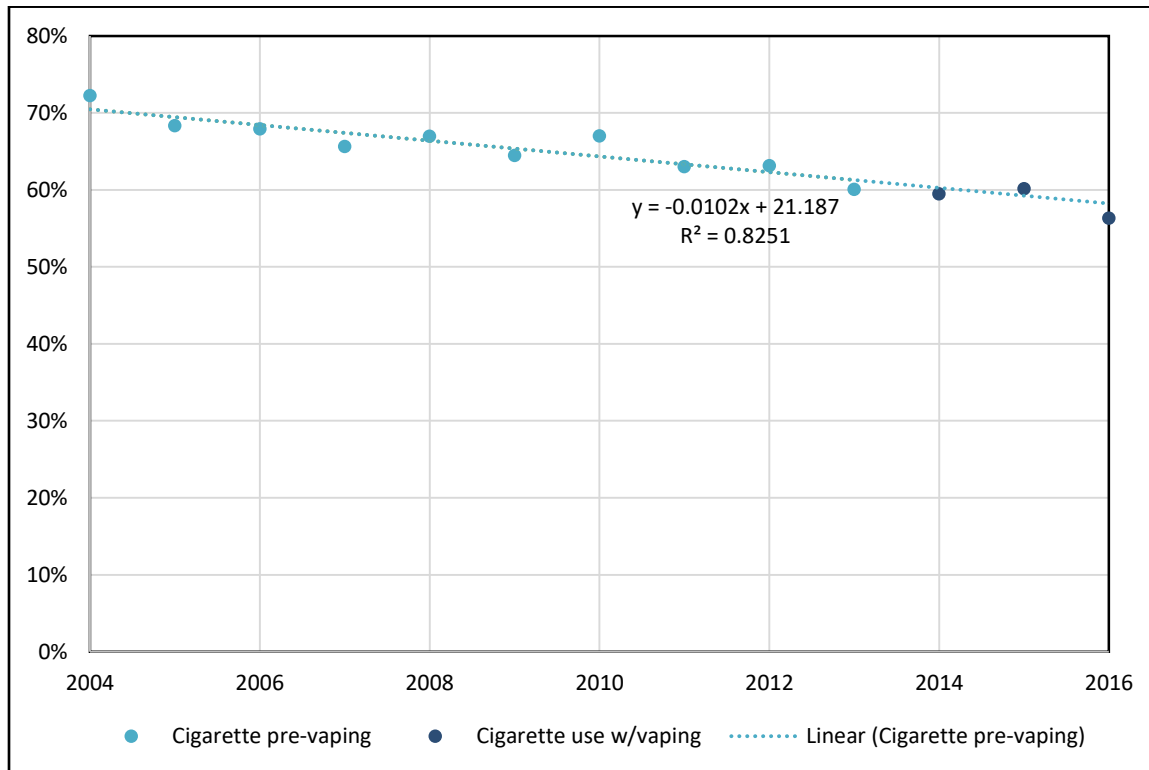

Supplement: tobaccocontrol-2018-054446supp002.pdf [file tobaccocontrol-2018-054446supp002.pdf]
