# Supplementary material for: Examining the relationship of vaping to smoking initiation among US youth and young adults: a reality check
Source: PubMed Central journal article supplement — Tob Control. 2018 Nov 20;28(6):629–35. doi: 10.1136/tobaccocontrol-2018-054446 (PMC6860409; doi:10.1136/tobaccocontrol-2018-054446), 2018-11-20
Supplement: tobaccocontrol-2018-054446supp003.pdf [file tobaccocontrol-2018-054446supp003.pdf]

**Supplement 3.**

**Supplement 3: Table 1. Trend Line Analysis with Vaping-Related Deviations from Long-Term Trend, Log Form of Dependent Variable, Various Surveys, with Corrections for Autocorrelation (only for Equations w Durbin Watson Statistics in the Indeterminate Region)**

| Survey | Measure                               | Years Included | Long-term trend | P-value | Vaping trend | P-value | Adj. R-squared |
|--------|---------------------------------------|----------------|-----------------|---------|--------------|---------|----------------|
| MTF    | 10 <sup>th</sup> -grade, M & F        | 2004-2017      | -0.043          | <0.001  | -0.086       | 0.01    | 0.911          |
| MTF    | 12 <sup>th</sup> -grade, M & F        | 2004-2017      | -0.03           | <0.001  | -0.056       | 0.002   | 0.958          |
| MTF    | Ages 22-24, M & F                     | 2004-2016      | -0.08           | <0.001  | -0.059       | <0.001  | 0.970          |
| MTF    | 12 <sup>th</sup> -grade, Daily, M & F | 2004-2017      | -0.039          | <0.001  | -0.08        | 0.03    | 0.962          |
| MTF    | Ages 22-24, Daily, M & F              | 2004-2016      | -0.090          | <0.001  | -0.058       | 0.05    | 0.994          |
| MTF    | Ages 18-25, Half Pack, M & F          | 2004-2016      | -0.065          | <0.001  | -0.048       | 0.05    | 0.989          |
| NHIS   | Current Smoker, 18-24, F              | 2004-2016      | -0.054          | <0.001  | -0.078       | 0.02    | 0.945          |
| MTF    | 10 <sup>th</sup> -grade, M & F        | 2004-2017      | -0.020          | <0.001  | -0.025       | 0.05    | 0.922          |
| MTF    | Ages 22-24, M & F                     | 2004-2016      | -0.022          | 0.002   | -0.012       | 0.17    | 0.888          |

Notes: MTF= Monitoring the Future survey, NHIS = National Health Interview Survey, M= Male, F=Female

Equations were corrected for autocorrelation by first estimating the correlation of the error term,  $e_t = a + \rho e_{t-1}$ , then adjusting the dependent variable  $y$  as  $(y_t - \rho y_{t-1})$

**Supplement 3: Table 2. Trend Line Analysis with Vaping-Related Deviations from Long-Term Trend, Various Surveys, with the Dependent Variable in Linear Form**

| Survey                           | Measure                  | Years Included | Long-term trend | P-value | Vaping trend | P-value | Durbin Watson Stat. | Adj. R-squared |
|----------------------------------|--------------------------|----------------|-----------------|---------|--------------|---------|---------------------|----------------|
| <b>Last 30-day Cigarette Use</b> |                          |                |                 |         |              |         |                     |                |
| MTF                              | 10th grade, M & F        | 2004-2017      | -0.089          | <0.001  | -0.72        | 0.03    | 1.21*               | 0.954          |
| MTF                              | 12th grade, M & F        | 2004-2017      | -0.92           | <0.001  | -0.86        | 0.002   | 1.28*               | 0.982          |
| MTF                              | Ages 18-21, M & F        | 2004-2016      | -1.09           | <0.001  | -0.77        | 0.04    | 1.23                | 0.975          |
| MTF                              | Ages 22-24, M & F        | 2004-2016      | -1.18           | <0.001  | -0.267       | 0.85    | 3.03*               | 0.970          |
| NSDUH                            | Last 30 day Ages 18-25   | 2004-2016      | -0.96           | <0.001  | -1.73        | <0.001  | 2.23                | 0.981          |
| <b>Established Cigarette Use</b> |                          |                |                 |         |              |         |                     |                |
| MTF                              | 10th grade, Daily M & F  | 2004-2017      | -0.43           | <0.001  | -0.27        | 0.09    | 1.97                | 0.960          |
| MTF                              | 12th grade, Daily, M & F | 2004-2017      | -0.69           | <0.001  | -0.45        | 0.03    | 1.19*               | 0.972          |
| MTF                              | Ages 18-21, Daily, M & F | 2004-2016      | -0.85           | <0.001  | -0.58        | 0.06    | 1.62                | 0.970          |
| MTF                              | Ages 22-24, Daily, M & F | 2004-2016      | -1.04           | <0.001  | -0.013       | 0.05    | 1.99                | 0.980          |
| NSDUH                            | Ages 18-25, Daily M & F  | 2004-2016      | -0.75           | <0.001  | -0.62        | <0.001  | 2.04                | 0.994          |
| NHIS                             | Current Smoker, 18-24, M | 2004-2016      | -0.79           | 0.002   | -1.53        | 0.08    | 2.23                | 0.835          |
| NHIS                             | Current Smoker, 18-24, F | 2004-2016      | -0.71           | <0.001  | -0.50        | 0.25    | 2.84*               | 0.781          |
| <b>Daily Use/Last 30 Day Use</b> |                          |                |                 |         |              |         |                     |                |
| MTF                              | 10th grade, M & F        | 2004-2017      | -0.006          | 0.02    | -0.005       | 0.48    | 3.11*               | 0.657          |
| MTF                              | 12th grade, M & F        | 2004-2017      | -0.008          | <0.001  | -0.014       | 0.001   | 1.23*               | 0.953          |
| MTF                              | Ages 18-21, M & F        | 2004-2016      | -0.008          | <0.001  | -0.003       | 0.001   | 2.29                | 0.923          |
| MTF                              | Ages 22-24, M & F        | 2004-2016      | -0.010          | <0.001  | -0.004       | -0.87   | 2.58*               | 0.888          |
| NSDUH                            | Ages 18-25, M & F        | 2004-2016      | -0.82           | <0.001  | -0.083       | 0.81    | 2.19                | 0.906          |

Notes: Durbin Watson Statistic (k=2, n= 13: dl=0.86, du= 1.56; k=2, n= 14, dl=0.91, du= 1.55), \* = indeterminate region, MTF= Monitoring the Future survey, NSDUH =National Survey of Drug Use and Health, NHIS = National Health Interview Survey, M= Male, F=Female

**Supplement 3: Table 3a. Trend Line Analysis of Last 30-day Use with Vaping-Related Deviations from Long-Term Trend, Log Form, Various Surveys, with Different Begin Dates for Vaping Trend: 2012, 2013, 2014**

| Survey                 | Measure            | Years     | Initial Year of Vaping trend | Long-term trend | P-value | Vaping trend | P-value | Durban-Watson Statistic | Adj R-squared |
|------------------------|--------------------|-----------|------------------------------|-----------------|---------|--------------|---------|-------------------------|---------------|
| <b>Last 30-day Use</b> |                    |           |                              |                 |         |              |         |                         |               |
| MTF                    | 10th grade, M & F* | 2004-2017 | 2014                         | -0.340          | <.0001  | -0.130       | <.0001  | 2.44*                   | 0.980         |
| MTF                    | 10th grade, M & F* | 2004-2017 | 2013                         | -0.046          | <.0001  | -0.133       | <.0001  | 1.87                    | 0.975         |
| MTF                    | 10th grade, M & F* | 2004-2017 | 2012                         | -0.058          | <.0001  | -0.140       | <.0001  | 1.28*                   | 0.954         |
| MTF                    | 12th grade, M & F* | 2004-2017 | 2014                         | -0.046          | <.0001  | -0.096       | <.0001  | 1.16*                   | 0.985         |
| MTF                    | 12th grade, M & F* | 2004-2017 | 2013                         | -0.040          | <.0001  | -0.086       | <.0001  | 2.45*                   | 0.990         |
| MTF                    | 12th grade, M & F* | 2004-2017 | 2012                         | -0.034          | <.0001  | -0.078       | <.0001  | 1.69                    | 0.988         |
| MTF                    | Ages 18-21, M & F  | 2004-2016 | 2014                         | -0.048          | <.0001  | -0.091       | 0.0005  | 2.28                    | 0.973         |
| MTF                    | Ages 18-21, M & F  | 2004-2016 | 2013                         | -0.047          | <.0001  | -0.061       | 0.01    | 2.02                    | 0.951         |
| MTF                    | Ages 18-21, M & F  | 2004-2016 | 2012                         | -0.049          | 0.0200  | -0.045       | 0.0008  | 1.63                    | 0.943         |
| MTF                    | Ages 22-24, M & F  | 2004-2016 | 2014                         | -0.047          | <.0001  | -0.041       | 0.0100  | 3.00*                   | 0.979         |
| MTF                    | Ages 22-24, M & F  | 2004-2016 | 2013                         | -0.470          | <.0001  | -0.025       | 0.0800  | 2.74*                   | 0.969         |
| MTF                    | Ages 22-24, M & F  | 2004-2016 | 2012                         | -0.021          | <.0001  | -0.046       | <.0001  | 2.48                    | 0.968         |
| NSDUH                  | Ages 18-25, M&F    | 2004-2016 | 2014                         | -0.027          | <.0001  | -0.075       | <.0001  | 2.21                    | 0.982         |
| NSDUH                  | Ages 18-25, M&F    | 2004-2016 | 2013                         | -0.024          | <.0001  | -0.059       | <.0001  | 2.09                    | 0.976         |
| NSDUH                  | Ages 18-25, M&F    | 2004-2016 | 2012                         | -0.021          | 0.0006  | -0.050       | 0.0003  | 1.59                    | 0.967         |

Notes: Durbin Watson Statistic (k=2, n= 13: dl=0.86, du= 1.56; k=2, n= 14, dl=0.91, du= 1.55),  
 \* = indeterminate region, MTF= Monitoring the Future survey, NSDUH =National Survey of Drug Use and Health,

**Supplement 3: Table 3b. Trend Line Analysis of Established Use with Vaping-Related Deviations from Long-Term Trend, Log Form, Various Surveys, with Different Begin Dates for Vaping Trend: 2012, 2013, 2014**

| Survey           | Measure                       | Years     | Initial Year of Vaping trend | Long-term trend | P-value | Vaping trend | P-value | Durban - Watson Statistic | Adj R-squared |
|------------------|-------------------------------|-----------|------------------------------|-----------------|---------|--------------|---------|---------------------------|---------------|
| <b>Daily Use</b> |                               |           |                              |                 |         |              |         |                           |               |
| MTF              | Daily, 10th grade, M & F      | 2004-2017 | 2014                         | -0.070          | <.0001  | -0.15        | 0.0010  | 2.23                      | 0.959         |
| MTF              | Daily, 10th grade, M & F      | 2004-2017 | 2013                         | -0.058          | 0.0003  | -0.14        | 0.0003  | 2.81*                     | 0.958         |
| MTF              | Daily, 10th grade, M & F      | 2004-2017 | 2012                         | -0.130          | 0.0002  | -0.048       | 0.004   | 2.93*                     | 0.959         |
| MTF              | Daily, 12th grade, M & F      | 2004-2017 | 2014                         | -0.061          | <.0001  | -0.13        | <.0001  | 1.19*                     | 0.986         |
| MTF              | Daily, 12th grade, M & F      | 2004-2017 | 2013                         | -0.053          | <.0001  | -0.12        | <.0001  | 2.50*                     | 0.989         |
| MTF              | Daily, 12th grade, M & F      | 2004-2017 | 2012                         | -0.061          | <.0001  | -0.13        | <.0001  | 1.19*                     | 0.986         |
| MTF              | Daily, Ages 18-21, M & F      | 2004-2016 | 2014                         | -0.063          | <.0001  | -0.15        | <.0001  | 2.09                      | 0.977         |
| MTF              | Daily, Ages 18-21, M & F      | 2004-2016 | 2013                         | -0.059          | <.0001  | -0.10        | 0.0020  | 1.95                      | 0.974         |
| MTF              | Daily, Ages 18-21, M & F      | 2004-2016 | 2012                         | -0.055          | <.0001  | -0.085       | 0.0090  | 1.51*                     | 0.940         |
| MTF              | Daily, Ages 22-24, M & F      | 2004-2016 | 2014                         | -0.062          | <.0001  | -0.050       | 0.0100  | 2.65*                     | 0.982         |
| MTF              | Daily, Ages 22-24, M & F      | 2004-2016 | 2013                         | -0.062          | <.0001  | -0.034       | 0.0400  | 2.82*                     | 0.977         |
| MTF              | Daily, Ages 22-24, M & F      | 2004-2016 | 2012                         | -0.029          | <.0001  | -0.020       | 0.0600  | 2.61*                     | 0.976         |
| NSDUH            | Daily, Ages 18-25, M & F      | 2004-2016 | 2014                         | -0.044          | <.0001  | -0.083       | <.0001  | 2.36*                     | 0.988         |
| NSDUH            | Daily, Ages 18-25, M & F      | 2004-2016 | 2013                         | -0.041          | <.0001  | -0.065       | <.0001  | 1.80*                     | 0.984         |
| NSDUH            | Daily, Ages 18-25, M & F      | 2004-2016 | 2012                         | -0.038          | <.0001  | -0.054       | 0.0008  | 1.38*                     | 0.976         |
| NHIS             | Current Smoker, Ages 18-24, M | 2004-2016 | 2014                         | -0.033          | 0.002   | -0.099       | 0.012   | 2.22                      | 0.876         |
| NHIS             | Current Smoker, Ages 18-24, M | 2004-2016 | 2013                         | -0.031          | 0.011   | -0.073       | 0.028   | 2.27                      | 0.857         |

|      |                               |           |      |        |        |        |      |       |       |
|------|-------------------------------|-----------|------|--------|--------|--------|------|-------|-------|
| NHIS | Current Smoker, Ages 18-24, M | 2004-2016 | 2012 | -0.038 | 0.0037 | -0.032 | 0.18 | 2.59* | 0.879 |
| NHIS | Current Smoker, Ages 18-24, F | 2004-2016 | 2014 | -0.040 | 0.0002 | -0.059 | 0.05 | 2.99* | 0.899 |
| NHIS | Current Smoker, Ages 18-24, F | 2004-2016 | 2013 | -0.039 | 0.0009 | -0.039 | 0.14 | 2.78* | 0.883 |
| NHIS | Current Smoker, Ages 18-24, F | 2004-2016 | 2012 | -0.038 | 0.0037 | -0.032 | 0.17 | 2.59* | 0.879 |

Notes: Durbin Watson Statistic (k=2, n= 13: dl=0.86, du= 1.56; k=2, n= 14, dl=0.91, du= 1.55), \* = indeterminate region, MTF= Monitoring the Future survey, NSDUH =National Survey of Drug Use and Health, NHIS = National Health Interview Study

**Supplement 3: Table 3c. Trend Line Analysis of Daily/Last 30-day Use with Deviations from Long-Term Trend with Vaping, Log Form, Various Surveys, with Different Begin Dates for Vaping Trend: 2012, 2013, 2014**

| Survey                           | Measure           | Years     | Initial Year of Vaping trend | Long-term trend | P-value | Vaping trend | P-value | Durbin-Watson Statistic | Adj R-squared |
|----------------------------------|-------------------|-----------|------------------------------|-----------------|---------|--------------|---------|-------------------------|---------------|
| <b>Daily Use/Last 30-day Use</b> |                   |           |                              |                 |         |              |         |                         |               |
| MTF                              | 10th grade, M & F | 2004-2017 | 2014                         | -0.013          | 0.03    | -0.013       | 0.46    | 3.16*                   | 0.954         |
| MTF                              | 10th grade, M & F | 2004-2017 | 2013                         | -0.013          | 0.05    | -0.008       | 0.55    | 3.10*                   | 0.974         |
| MTF                              | 10th grade, M & F | 2004-2017 | 2012                         | -0.006          | 0.65    | -0.012       | 0.08    | 3.05*                   | 0.800         |
| MTF                              | 12th grade, M & F | 2004-2017 | 2014                         | -0.015          | <.0001  | -0.037       | 0.0002  | 2.01                    | 0.963         |
| MTF                              | 12th grade, M & F | 2004-2017 | 2014                         | -0.015          | <.0001  | -0.034       | 0.0002  | 1.30*                   | 0.963         |
| MTF                              | 12th grade, M & F | 2004-2017 | 2013                         | -0.013          | <.0001  | -0.029       | 0.0001  | 2.45                    | 0.958         |
| MTF                              | 12th grade, M & F | 2004-2017 | 2012                         | -0.011          | 0.0030  | -0.026       | 0.009   | 1.82                    | 0.952         |
| MTF                              | Ages 18-21, M & F | 2004-2016 | 2014                         | -0.013          | 0.0004  | -0.058       | 0.0002  | 2.33                    | 0.941         |
| MTF                              | Ages 18-21, M & F | 2004-2016 | 2013                         | -0.013          | 0.0001  | -0.029       | 0.0010  | 2.35                    | 0.965         |
| MTF                              | Ages 18-21, M & F | 2004-2016 | 2012                         | -0.010          | 0.06    | -0.035       | 0.0065  | 1.93                    | 0.890         |
| MTF                              | Ages 22-24, M & F | 2004-2016 | 2014                         | -0.015          | <.0001  | -0.008       | 0.39    | 2.62*                   | 0.891         |
| MTF                              | Ages 22-24, M & F | 2004-2016 | 2013                         | -0.014          | 0.0003  | -0.009       | 0.26    | 3.10*                   | 0.897         |
| MTF                              | Ages 22-24, M & F | 2004-2016 | 2012                         | -0.014          | <.0001  | -0.078       | 0.28    | 3.24*                   | 0.896         |
| NSDUH                            | Ages 18-25, M & F | 2004-2016 | 2014                         | -0.017          | <.0001  | -0.05        | 0.51    | 2.29                    | 0.937         |
| NSDUH                            | Ages 18-25, M & F | 2004-2016 | 2013                         | -0.017          | <.0001  | -0.04        | 0.55    | 2.22                    | 0.936         |
| NSDUH                            | Ages 18-25, M & F | 2004-2016 | 2012                         | -0.017          | <.0001  | -0.0057      | 0.78    | 2.21                    | 0.934         |

Notes: Durbin Watson Statistic (k=2, n= 13: dl=0.86, du= 1.56; k=2, n= 14, dl=0.91, du= 1.55), \* = indeterminate region, MTF= Monitoring the Future survey, NSDUH =National Survey of Drug Use and Health, NHIS = National Health Interview Study
